# Supplementary material for: Evaluation of the Effect of Parenting Style and Parental Mealtime Actions on the Eating Behavior of Children with Epilepsy
Source: MDPI journal article supplement (doi:10.3390/nu16091384), 2024-05-02
Supplement: s1 [file s1]

## Evaluation of the Effect of Parenting Style and Parental Eating Time Actions on Eating Behavior in Children with Epilepsy

**Table S1:** The scales and HEI-2015 scores according to some characteristics of children with epilepsy.

|                                    | Age          |              | P-value | Number of antiepileptic drugs |              | P-value | Seizures after pharmacologic treatment |              | P-value | Picky eating status |               | P-value |
|------------------------------------|--------------|--------------|---------|-------------------------------|--------------|---------|----------------------------------------|--------------|---------|---------------------|---------------|---------|
|                                    | ≤5.4 years   | >5.4 years   |         | I                             | ≥II          |         | Yes                                    | No           |         | Yes                 | No            |         |
|                                    | Mean ± SD    | Mean ± SD    |         | Mean ± SD                     | Mean ± SD    |         | Mean ± SD                              | Mean ± SD    |         | Mean ± SD           | Mean ± SD     |         |
| MAPS                               |              |              |         |                               |              |         |                                        |              |         |                     |               |         |
| Proactive parenting                | 25.07 ± 3.25 | 25.35 ± 2.57 | 0.789   | 24.96 ± 2.85                  | 26.00 ± 2.88 | 0.381   | 24.61 ± 2.81                           | 26.08 ± 2.78 | 0.161   | 25.55 ± 3.09        | 24.64 ± 2.38  | 0.402   |
| Positive reinforcement             | 18.21 ± 2.15 | 17.35 ± 3.35 | 0.414   | 17.48 ± 3.16                  | 18.50 ± 1.69 | 0.394   | 18.00 ± 1.85                           | 17.39 ± 3.93 | 0.564   | 18.00 ± 3.21        | 17.27 ± 2.15  | 0.508   |
| Warmth                             | 14.00 ± 1.36 | 14.35 ± 1.22 | 0.453   | 14.09 ± 1.35                  | 14.50 ± 1.07 | 0.440   | 13.89 ± 1.53                           | 14.62 ± 0.65 | 0.119   | 14.75 ± 0.44        | 13.18 ± 1.66  | 0.011*  |
| Supportiveness                     | 37.50 ± 4.03 | 35.47 ± 3.28 | 0.133   | 35.61 ± 3.50                  | 38.63 ± 3.62 | 0.046*  | 36.72 ± 3.36                           | 35.92 ± 4.27 | 0.564   | 36.40 ± 3.78        | 36.36 ± 3.80  | 0.980   |
| Hostility                          | 12.57 ± 2.79 | 14.18 ± 4.42 | 0.249   | 13.61 ± 3.99                  | 13.00 ± 3.42 | 0.703   | 12.56 ± 2.75                           | 14.69 ± 4.75 | 0.124   | 13.65 ± 3.50        | 13.09 ± 4.46  | 0.702   |
| Lax control                        | 13.71 ± 4.20 | 15.41 ± 4.98 | 0.319   | 14.83 ± 5.19                  | 14.13 ± 2.70 | 0.720   | 14.67 ± 4.64                           | 14.62 ± 4.84 | 0.976   | 15.10 ± 4.12        | 13.82 ± 5.60  | 0.472   |
| Physical control                   | 5.29 ± 2.02  | 4.41 ± 1.18  | 0.143   | 4.48 ± 1.16                   | 5.75 ± 2.43  | 0.192   | 4.89 ± 1.84                            | 4.69 ± 1.38  | 0.748   | 4.40 ± 0.99         | 5.55 ± 2.30   | 0.141   |
| Broadband positive parenting       | 94.79 ± 8.71 | 92.53 ± 7.72 | 0.451   | 92.13 ± 8.44                  | 97.63 ± 5.78 | 0.100   | 93.22 ± 7.07                           | 94.00 ± 9.69 | 0.798   | 94.70 ± 8.36        | 91.45 ± 7.61  | 0.295   |
| Broadband negative parenting       | 31.57 ± 5.29 | 34.00 ± 8.75 | 0.371   | 32.91 ± 8.22                  | 32.88 ± 4.58 | 0.990   | 32.11 ± 5.08                           | 34.00 ± 9.87 | 0.491   | 33.15 ± 5.07        | 32.45 ± 10.68 | 0.807   |
| PMAS                               |              |              |         |                               |              |         |                                        |              |         |                     |               |         |
| Snack limits                       | 5.36 ± 1.87  | 6.47 ± 1.88  | 0.110   | 6.00 ± 1.95                   | 5.88 ± 1.96  | 0.877   | 6.11 ± 1.91                            | 5.77 ± 2.01  | 0.633   | 5.65 ± 1.69         | 6.55 ± 2.25   | 0.221   |
| Positive persuasion                | 9.79 ± 1.72  | 8.82 ± 2.22  | 0.194   | 9.22 ± 2.26                   | 9.38 ± 1.30  | 0.854   | 9.22 ± 2.05                            | 9.31 ± 2.10  | 0.910   | 9.50 ± 2.12         | 8.82 ± 1.89   | 0.380   |
| Daily fruit-vegetable availability | 7.07 ± 1.64  | 7.76 ± 0.97  | 0.178   | 7.35 ± 1.43                   | 7.75 ± 1.04  | 0.473   | 7.11 ± 1.57                            | 7.92 ± 0.76  | 0.067   | 7.70 ± 1.22         | 7.00 ± 1.48   | 0.167   |
| Use of rewards                     | 7.00 ± 1.62  | 7.06 ± 2.11  | 0.932   | 6.91 ± 2.04                   | 7.38 ± 1.30  | 0.556   | 6.78 ± 1.99                            | 7.38 ± 1.71  | 0.382   | 7.40 ± 1.85         | 6.36 ± 1.80   | 0.143   |
| Insistence on eating               | 4.57 ± 1.22  | 5.47 ± 2.21  | 0.164   | 5.26 ± 2.03                   | 4.50 ± 1.20  | 0.327   | 4.78 ± 1.80                            | 5.46 ± 1.94  | 0.321   | 5.05 ± 2.01         | 5.09 ± 1.64   | 0.954   |
| Snack modelling                    | 6.14 ± 1.56  | 5.53 ± 1.84  | 0.332   | 6.00 ± 1.78                   | 5.25 ± 1.49  | 0.296   | 5.89 ± 1.64                            | 5.69 ± 1.89  | 0.759   | 5.80 ± 1.82         | 5.82 ± 1.60   | 0.978   |
| Special meals                      | 9.29 ± 1.07  | 8.65 ± 1.17  | 0.127   | 8.87 ± 1.18                   | 9.13 ± 1.13  | 0.598   | 9.06 ± 1.26                            | 8.77 ± 1.01  | 0.504   | 9.15 ± 0.88         | 8.55 ± 1.51   | 0.242   |
| Fat reduction                      | 3.50 ± 1.02  | 3.76 ± 1.25  | 0.530   | 3.61 ± 1.03                   | 3.75 ± 1.49  | 0.769   | 3.83 ± 1.25                            | 3.38 ± 0.96  | 0.288   | 3.50 ± 0.95         | 3.91 ± 1.45   | 0.348   |
| Many food choices                  | 9.00 ± 2.00  | 9.06 ± 1.60  | 0.928   | 9.13 ± 1.79                   | 8.75 ± 1.75  | 0.607   | 9.33 ± 1.28                            | 8.62 ± 2.26  | 0.316   | 9.05 ± 2.06         | 9.00 ± 1.10   | 0.930   |
| CEBQ                               |              |              |         |                               |              |         |                                        |              |         |                     |               |         |
| Food responsiveness                | 9.29 ± 3.56  | 10.18 ± 4.46 | 0.550   | 9.78 ± 4.42                   | 9.75 ± 2.92  | 0.985   | 10.44 ± 3.68                           | 8.85 ± 4.47  | 0.284   | 9.25 ± 3.42         | 10.73 ± 5.02  | 0.338   |
| Emotional overeating               | 6.50 ± 3.06  | 6.76 ± 2.88  | 0.806   | 6.87 ± 3.27                   | 6.00 ± 1.51  | 0.477   | 6.61 ± 2.87                            | 6.69 ± 3.09  | 0.941   | 5.90 ± 1.83         | 8.00 ± 4.00   | 0.124   |
| Enjoyment of food                  | 15.21 ± 4.74 | 15.94 ± 5.93 | 0.713   | 15.17 ± 5.98                  | 16.88 ± 2.80 | 0.448   | 17.39 ± 5.08                           | 13.15 ± 4.88 | 0.027*  | 14.10 ± 5.58        | 18.36 ± 3.72  | 0.031*  |
| Desire to drink                    | 9.57 ± 3.55  | 10.06 ± 3.23 | 0.692   | 9.74 ± 3.51                   | 10.13 ± 2.95 | 0.783   | 9.83 ± 3.57                            | 9.85 ± 3.11  | 0.992   | 10.25 ± 3.55        | 9.09 ± 2.88   | 0.362   |
| Satiety responsiveness             | 22.07 ± 4.27 | 21.59 ± 5.41 | 0.788   | 22.30 ± 5.17                  | 20.38 ± 3.70 | 0.341   | 20.78 ± 3.98                           | 23.23 ± 5.72 | 0.169   | 23.80 ± 4.26        | 18.18 ± 3.71  | 0.001*  |

|                        |               |              |       |               |               |        |               |               |       |               |              |        |
|------------------------|---------------|--------------|-------|---------------|---------------|--------|---------------|---------------|-------|---------------|--------------|--------|
| Slowness in eating     | 10.64 ± 4.40  | 9.29 ± 3.87  | 0.371 | 10.83 ± 3.99  | 7.25 ± 3.37   | 0.031* | 9.33 ± 4.06   | 10.69 ± 4.19  | 0.372 | 10.35 ± 4.67  | 9.09 ± 2.81  | 0.357  |
| Emotional undereating  | 11.07 ± 4.81  | 10.18 ± 4.31 | 0.589 | 10.61 ± 4.64  | 10.50 ± 4.31  | 0.954  | 10.72 ± 4.61  | 10.38 ± 4.48  | 0.840 | 10.65 ± 4.34  | 10.45 ± 4.95 | 0.910  |
| Fussiness              | 8.21 ± 3.31   | 8.12 ± 4.17  | 0.944 | 8.17 ± 3.89   | 8.13 ± 3.52   | 0.975  | 9.11 ± 3.20   | 6.85 ± 4.16   | 0.097 | 10.27 ± 2.33  | 7.00 ± 3.91  | 0.007* |
| Food approach behavior | 10.08 ± 2.39  | 10.50 ± 2.42 | 0.633 | 10.35 ± 2.58  | 10.20 ± 1.82  | 0.879  | 10.72 ± 2.49  | 9.75 ± 2.19   | 0.270 | 10.02 ± 2.06  | 10.85 ± 2.90 | 0.362  |
| Food avoidant behavior | 11.32 ± 1.84  | 10.66 ± 1.98 | 0.346 | 11.27 ± 1.94  | 10.06 ± 1.63  | 0.124  | 11.02 ± 2.06  | 10.87 ± 1.76  | 0.835 | 10.98 ± 1.99  | 10.91 ± 1.85 | 0.919  |
| HEI-2015               | 50.29 ± 13.70 | 47.28 ± 9.58 | 0.479 | 47.52 ± 10.12 | 51.87 ± 15.17 | 0.366  | 46.33 ± 10.25 | 51.84 ± 12.79 | 0.193 | 50.29 ± 12.31 | 45.63 ± 9.72 | 0.288  |

\*p<0.05, a: Independent samples t test

SD: Standard deviation; MAPS: The Multidimensional Assessment of Parenting Scale; PMAS: The Parent Mealtime Action Scale; CEBQ: The Children's Eating Behavior Questionnaire; HEI-2015: The Healthy Eating Index-2015

**Table S2:** The scales and HEI-2015 scores according to some characteristics of parents of children with epilepsy.

|                                    | Age          |              |         | Sex          |              |         | Education level |               |         |
|------------------------------------|--------------|--------------|---------|--------------|--------------|---------|-----------------|---------------|---------|
|                                    | < 40 years   | ≥ 40 years   | p-value | Female       | Male         | p-value | Primary school  | ≥ High school | p-value |
|                                    | Mean ± SD    | Mean ± SD    |         | Mean ± SD    | Mean ± SD    |         | Mean ± SD       | Mean ± SD     |         |
| MAPS                               |              |              |         |              |              |         |                 |               |         |
| Proactive parenting                | 25.33 ± 3.25 | 25.08 ± 2.29 | 0.809   | 25.25 ± 2.45 | 25.21 ± 3.14 | 0.971   | 24.33 ± 2.94    | 26.06 ± 2.57  | 0.091   |
| Positive reinforcement             | 17.50 ± 3.33 | 18.08 ± 2.14 | 0.588   | 17.00 ± 4.05 | 18.21 ± 1.75 | 0.258   | 17.60 ± 2.10    | 17.88 ± 3.50  | 0.794   |
| Warmth                             | 14.17 ± 1.47 | 14.23 ± 1.01 | 0.893   | 14.33 ± 0.89 | 14.11 ± 1.49 | 0.636   | 13.67 ± 1.63    | 14.69 ± 0.48  | 0.033*  |
| Supportiveness                     | 35.83 ± 3.73 | 37.15 ± 3.72 | 0.338   | 35.25 ± 4.25 | 37.11 ± 3.26 | 0.181   | 36.27 ± 3.94    | 36.50 ± 3.63  | 0.865   |
| Hostility                          | 14.28 ± 4.36 | 12.31 ± 2.59 | 0.158   | 12.50 ± 3.73 | 14.05 ± 3.82 | 0.275   | 12.20 ± 4.11    | 14.63 ± 3.18  | 0.075   |
| Lax control                        | 15.56 ± 5.51 | 13.38 ± 2.82 | 0.164   | 13.75 ± 3.98 | 15.21 ± 5.04 | 0.403   | 16.07 ± 5.54    | 13.31 ± 3.26  | 0.100   |
| Physical control                   | 4.72 ± 1.32  | 4.92 ± 2.06  | 0.743   | 4.33 ± 0.89  | 5.11 ± 1.94  | 0.144   | 5.33 ± 2.09     | 4.31 ± 0.87   | 0.096   |
| Broadband positive parenting       | 92.83 ± 8.96 | 94.54 ± 7.03 | 0.573   | 91.83 ± 9.75 | 94.63 ± 6.98 | 0.359   | 91.87 ± 8.40    | 95.13 ± 7.79  | 0.272   |
| Broadband negative parenting       | 34.56 ± 8.39 | 30.62 ± 5.16 | 0.145   | 30.58 ± 6.30 | 34.37 ± 7.78 | 0.168   | 33.60 ± 9.17    | 32.25 ± 5.42  | 0.619   |
| PMAS                               |              |              |         |              |              |         |                 |               |         |
| Snack limits                       | 6.17 ± 1.98  | 5.69 ± 1.89  | 0.507   | 5.67 ± 2.15  | 6.16 ± 1.80  | 0.498   | 6.40 ± 1.96     | 5.56 ± 1.86   | 0.232   |
| Positive persuasion                | 9.39 ± 2.25  | 9.08 ± 1.75  | 0.681   | 8.58 ± 2.54  | 9.68 ± 1.57  | 0.145   | 8.93 ± 1.87     | 9.56 ± 2.19   | 0.398   |
| Daily fruit-vegetable availability | 7.44 ± 1.38  | 7.46 ± 1.33  | 0.973   | 7.08 ± 1.68  | 7.68 ± 1.06  | 0.283   | 7.27 ± 1.58     | 7.63 ± 1.09   | 0.465   |
| Use of rewards                     | 7.06 ± 1.89  | 7.00 ± 1.92  | 0.937   | 6.50 ± 1.88  | 7.37 ± 1.83  | 0.213   | 6.93 ± 2.28     | 7.13 ± 1.46   | 0.781   |
| Insistence on eating               | 4.94 ± 1.70  | 5.23 ± 2.13  | 0.680   | 4.75 ± 1.22  | 5.26 ± 2.18  | 0.408   | 5.13 ± 1.51     | 5.00 ± 2.19   | 0.846   |
| Snack modelling                    | 6.39 ± 1.75  | 5.00 ± 1.35  | 0.024*  | 5.50 ± 1.98  | 6.00 ± 1.56  | 0.440   | 5.93 ± 1.71     | 5.69 ± 1.78   | 0.698   |
| Special meals                      | 8.83 ± 1.25  | 9.08 ± 1.04  | 0.570   | 9.17 ± 1.47  | 8.79 ± 0.92  | 0.384   | 9.00 ± 1.36     | 8.88 ± 0.96   | 0.769   |
| Fat reduction                      | 3.61 ± 1.09  | 3.69 ± 1.25  | 0.849   | 3.83 ± 1.27  | 3.53 ± 1.07  | 0.475   | 3.80 ± 1.08     | 3.50 ± 1.21   | 0.474   |
| Many food choices                  | 9.11 ± 1.57  | 8.92 ± 2.06  | 0.775   | 9.42 ± 1.56  | 8.79 ± 1.87  | 0.342   | 9.27 ± 1.03     | 8.81 ± 2.26   | 0.475   |
| CEBQ                               |              |              |         |              |              |         |                 |               |         |
| Food responsiveness                | 9.89 ± 4.86  | 9.62 ± 2.69  | 0.856   | 7.75 ± 2.73  | 11.05 ± 4.26 | 0.024*  | 10.60 ± 4.44    | 9.00 ± 3.60   | 0.278   |
| Emotional overeating               | 6.89 ± 3.58  | 6.31 ± 1.70  | 0.593   | 6.17 ± 3.07  | 6.95 ± 2.86  | 0.477   | 7.40 ± 3.80     | 5.94 ± 1.57   | 0.182   |
| Enjoyment of food                  | 15.67 ± 4.85 | 15.54 ± 6.19 | 0.949   | 15.00 ± 5.74 | 16.00 ± 5.22 | 0.621   | 17.60 ± 4.64    | 13.75 ± 5.43  | 0.043*  |
| Desire to drink                    | 10.78 ± 3.10 | 8.54 ± 3.31  | 0.063   | 9.00 ± 3.72  | 10.37 ± 3.04 | 0.272   | 10.27 ± 3.22    | 9.44 ± 3.48   | 0.497   |
| Satiety responsiveness             | 22.33 ± 4.64 | 21.08 ± 5.24 | 0.486   | 21.75 ± 5.48 | 21.84 ± 4.57 | 0.960   | 19.80 ± 3.80    | 23.69 ± 5.08  | 0.023*  |
| Slowness in eating                 | 10.39 ± 3.99 | 9.23 ± 4.32  | 0.447   | 9.83 ± 4.67  | 9.95 ± 3.84  | 0.941   | 8.40 ± 3.60     | 11.31 ± 4.14  | 0.046*  |
| Emotional undereating              | 9.67 ± 3.85  | 11.85 ± 5.13 | 0.186   | 8.83 ± 4.39  | 11.68 ± 4.30 | 0.085   | 10.93 ± 4.77    | 10.25 ± 4.33  | 0.679   |
| Fussiness                          | 8.06 ± 3.40  | 8.31 ± 4.31  | 0.857   | 7.75 ± 3.89  | 8.42 ± 3.73  | 0.635   | 6.69 ± 3.93     | 9.73 ± 2.89   | 0.020*  |
| Food approach behavior             | 10.43 ± 2.90 | 10.16 ± 1.47 | 0.739   | 9.52 ± 2.26  | 10.81 ± 2.37 | 0.143   | 10.91 ± 2.73    | 9.75 ± 1.91   | 0.179   |

|                        |               |               |       |               |               |       |               |               |       |
|------------------------|---------------|---------------|-------|---------------|---------------|-------|---------------|---------------|-------|
| Food avoidant behavior | 10.89 ± 1.80  | 11.05 ± 2.13  | 0.823 | 10.36 ± 1.60  | 11.34 ± 2.04  | 0.170 | 10.91 ± 1.87  | 11.00 ± 2.01  | 0.890 |
| HEI-2015               | 46.40 ± 10.75 | 51.75 ± 12.23 | 0.207 | 48.34 ± 11.62 | 48.83 ± 11.76 | 0.911 | 47.56 ± 11.91 | 49.65 ± 11.42 | 0.622 |

p<0.05, a: Independent samples t test

SD: Standard deviation; MAPS: The Multidimensional Assessment of Parenting Scale; PMAS: The Parent Mealtime Action Scale; CEBQ: The Children's Eating Behavior Questionnaire; HEI-2015: The Healthy Eating Index-2015
